# Supplementary material
Source: MDPI journal article supplement (https://www.mdpi.com/2075-4701/9/12/1343)
Supplement: s1 [file s1]

# Comparison of Charge Storage Properties of Prussian Blue Analogues Containing Cobalt and Copper

Amanda Rensmo and Jennifer R. Hampton \*

Physics Department, Hope College, Holland, MI, 49423, USA

\* Correspondence: hampton@hope.edu; Tel.: +1-616-395-7256

## Supplementary Figures

Figures S1-S3: Results for each individual sample corresponding to Figures 1-3 in the main text. Figure S4: Example Trasatti fits to integrated charge vs. scan rate. Figures S5-S7: Results for each individual sample corresponding to Figures 6-8 in the main text.

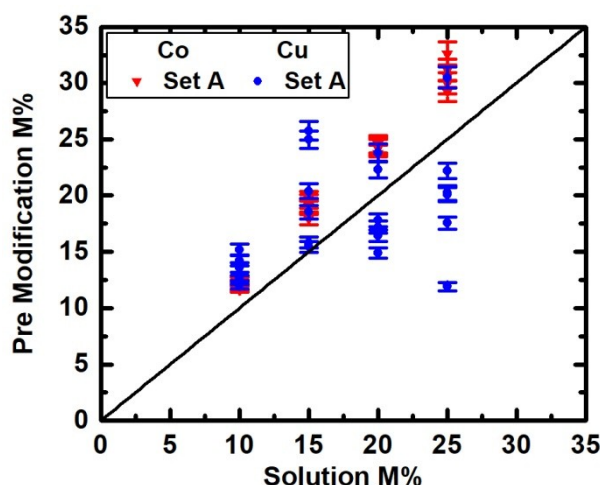

**Figure S1.** The dependence of the amount deposited metal for each solution percentage for the individual samples in Set A. The line represents a 1:1 relationship. Figure 1 shows the results grouped and averaged by deposition solution percentage.

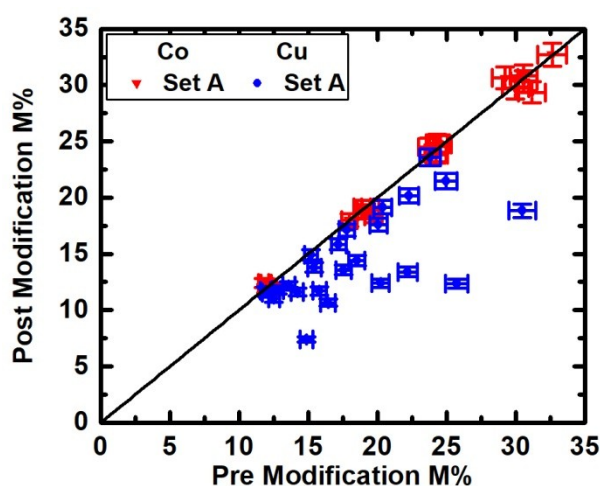

**Figure S2.** The dependence of the amount metal remaining after the modification step compared to the amount of deposited metal for the individual samples in Set A. The line represents a 1:1 relationship. Figure 2 shows the results grouped and averaged by deposition solution percentage.

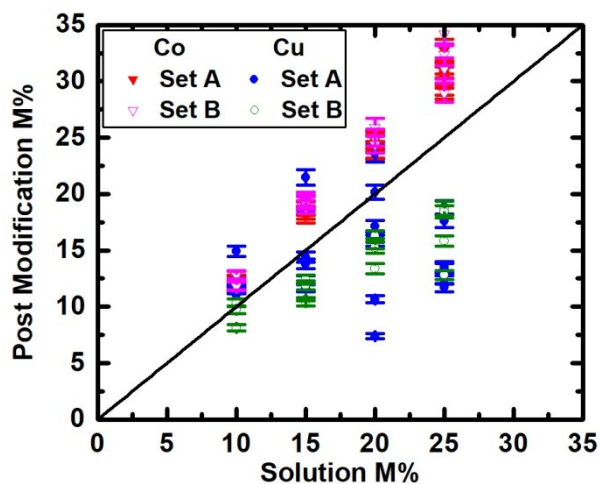

**Figure S3.** The dependence of the amount metal remaining after the modification step compared to the deposition solution percentage for the individual samples in Sets A and B. The line represents a 1:1 relationship. Figure 3 shows the results grouped and averaged by deposition solution percentage.

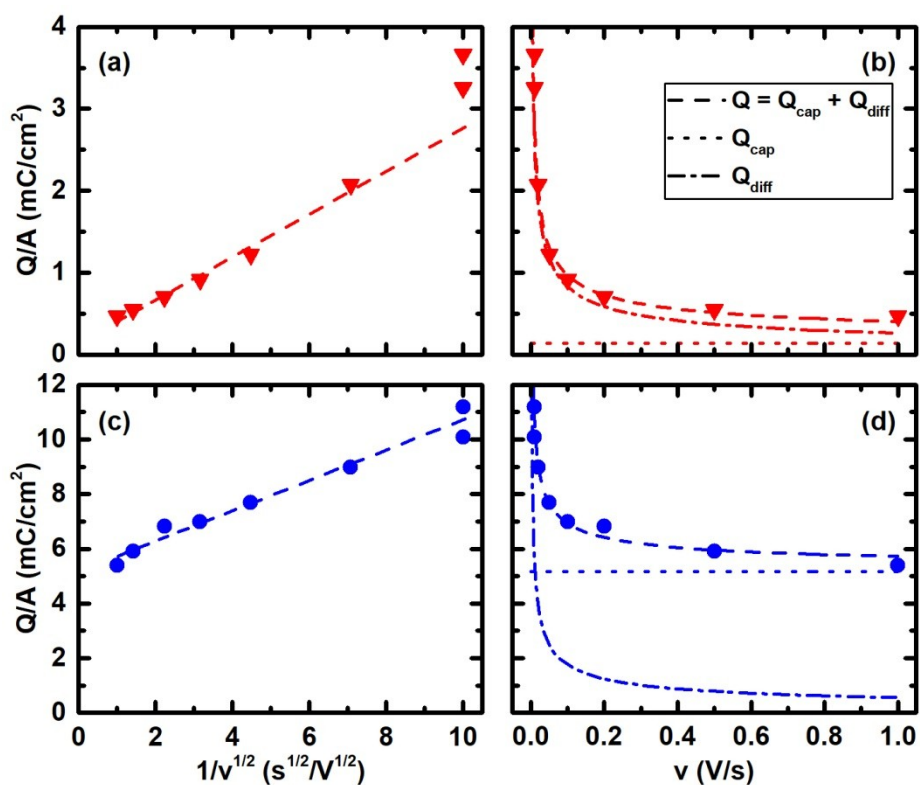

**Figure S4.** The integrated anodic charge per area for (a) a Co sample and (c) a Cu sample graphed vs  $v^{-1/2}$ . Fits to the Trasatti equation (Equation (6) in the main text) are shown. The same data and fits are graphed vs.  $v$  in (b) and (d) respectively, along with the capacitive and diffusional components inferred from the fits.

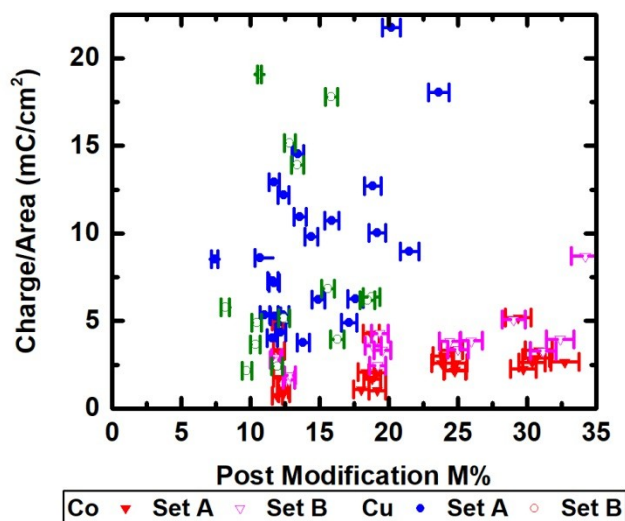

**Figure S5.** The measured anodic charge per area from the 20mV/s CV as a function of the amount of added metal for the individual samples in Sets A and B. Figure 6 shows the results grouped and averaged by deposition solution percentage.

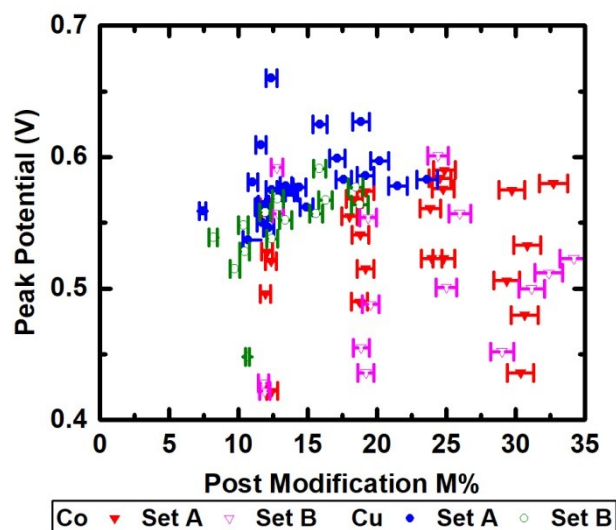

**Figure S6.** The anodic peak potential from the 20mV/s CV as a function of the amount of added metal for the individual samples in Sets A and B. Figure 7 shows the results grouped and averaged by deposition solution percentage.

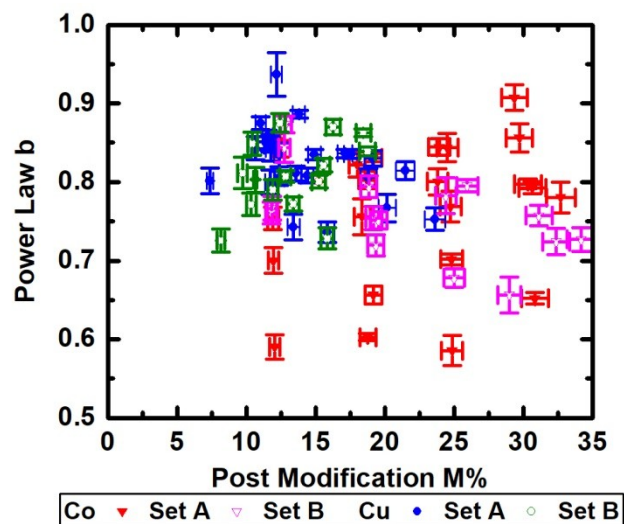

**Figure S7.** The b-value determined for a power-law fit to the anodic peak current density vs. scan rate as a function of the amount of added metal for the individual samples in Set A and B. Figure 8 shows the results grouped and averaged by deposition solution percentage.

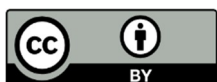

© 2019 by the authors. Submitted for possible open access publication under the terms and conditions of the Creative Commons Attribution (CC BY) license (<http://creativecommons.org/licenses/by/4.0/>).
